# Supplementary material for: Turn-off/turn-on biosensing of tetracycline and ciprofloxacin antibiotics using fluorescent iron oxide quantum dots
Source: Royal Society of Chemistry journal article supplement (doi:10.1039/d3ay02168h), 2024-01-01
Supplement: d3ay02168h1.pdf [file d3ay02168h1.pdf]

1  
2  
3 **Supplementary Materials**

4 **for**

5 **Turn-off/turn-on Biosensing of Tetracycline and Ciprofloxacin**  
6 **Antibiotics by Fluorescent Iron Oxide Quantum Dots**  
7

8 Sri Sudewi<sup>1,2</sup>, Chien-Hung Li<sup>1</sup>, Lutfi Chabib<sup>3</sup>, Akhtar Rasool<sup>4,5</sup>, Emmanuvel Arputharaj<sup>6</sup>,  
9 Muhammad Zulfajri<sup>7</sup>, and Genin Gary Huang<sup>1,8,9,\*</sup>

10  
11  
12  
13 <sup>1</sup>Department of Medicinal and Applied Chemistry, Kaohsiung Medical University, Kaohsiung  
14 80708, Taiwan

15 <sup>2</sup>Department of Pharmacy, Faculty of Mathematics and Natural Science, Universitas Sam  
16 Ratulangi, Manado 95115, Indonesia

17 <sup>3</sup>Pharmacy Study Program, Faculty of Mathematics and Science, Universitas Islam Indonesia,  
18 Yogyakarta 55584, Indonesia

19 <sup>4</sup>Department of Environmental Sciences, Osmania University, Hyderabad 500007, Telangana,  
20 India

21 <sup>5</sup>Research Center for Chemistry, National Research and Innovation Agency (BRIN), Kawasan  
22 PUSPITEK-Building 452, Serpong, Tangerang 15314, Indonesia

23 <sup>6</sup>Department of Medical Laboratory Science and Biotechnology, Kaohsiung Medical University,  
24 Kaohsiung 80708, Taiwan

25 <sup>7</sup>Department of Chemistry Education, Universitas Serambi Mekkah, Banda Aceh 23245,  
26 Indonesia

27 <sup>8</sup>Department of Medical Research, Kaohsiung Medical University Hospital, Kaohsiung 80708,  
28 Taiwan

29 <sup>9</sup>Department of Chemistry, National Sun Yat-sen University, Kaohsiung 80424, Taiwan  
30

31  
32  
33 \*To whom correspondence should be addressed.

34 E-mail: genin@kmu.edu.tw

35 Phone: +886-7-3121101#2810, Fax: +886-7-3125339  
36

37

38 **Table S1.** Determination results of TCy and CPx in the real sample (n=3)

39

| Antibiotic | Real Samples   | Amount found (μM) | Added (μM) | Total found (μM) | Recovery (%)  | RSD (%) |
|------------|----------------|-------------------|------------|------------------|---------------|---------|
| TCy        | Drinking water | 0                 | 1          | 1.14 ± 0.01      | 114.33 ± 0.57 | 0.50    |
|            | Honey          | 0                 | 10         | 11.77 ± 0.09     | 117.7 ± 0.95  | 0.81    |
| CPx        | Drinking water | 0                 | 1          | 1.12 ± 0.03      | 98.03 ± 0.75  | 0.76    |
|            | Honey          | 0                 | 10         | 9.80 ± 0.08      | 112.67 ± 2.51 | 2.23    |

40

41

42

43

44

45

46

47

48

49

50

51

52

53

54 **Figure S1**

55

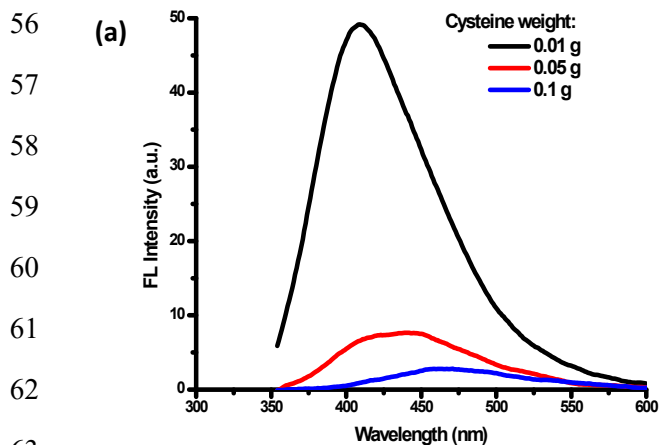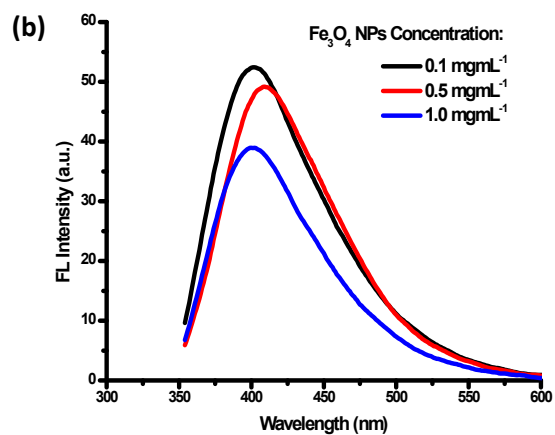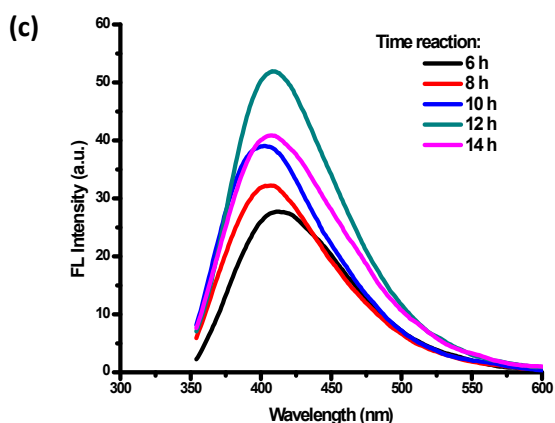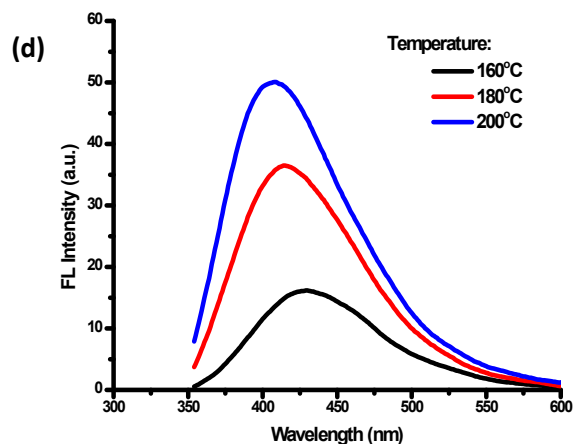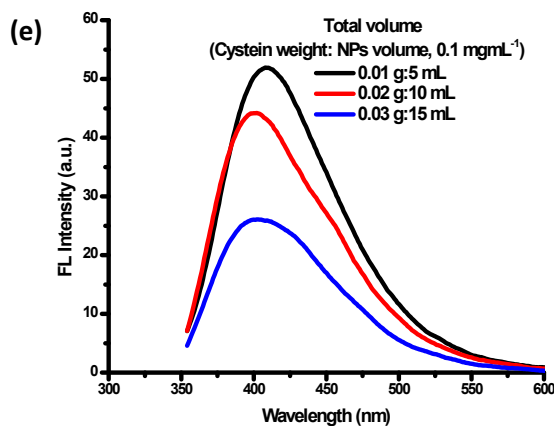

79 **Figure S1.** Synthetic condition of (a) cysteine weight ( $\text{Fe}_3\text{O}_4$  NPs=0.5  $\text{mgmL}^{-1}$ , 5 mL,  $t=12\text{h}$ ,  
80  $T=200^\circ\text{C}$ ). (b)  $\text{Fe}_3\text{O}_4$  NPs (cysteine weight=0.01 g,  $t=12$  h,  $T=200^\circ\text{C}$ ). (c) reaction time (cysteine  
81 weight=0.01 g,  $\text{Fe}_3\text{O}_4$  NPs=0.1  $\text{mgmL}^{-1}$ , 5 mL,  $T=200^\circ\text{C}$ ). (d) temperature (cysteine weight=0.01  
82 g,  $\text{Fe}_3\text{O}_4$  NPs=0.1  $\text{mgmL}^{-1}$ , 5 mL,  $t=12$  h). (e) total volume ( $t=12$  h,  $T=200^\circ\text{C}$ )

83 **Figure S2**

84

85

86

87

88

89

90

91

92

93

94

95

96

97

98

99

100

101

102

103

104

105

106

107

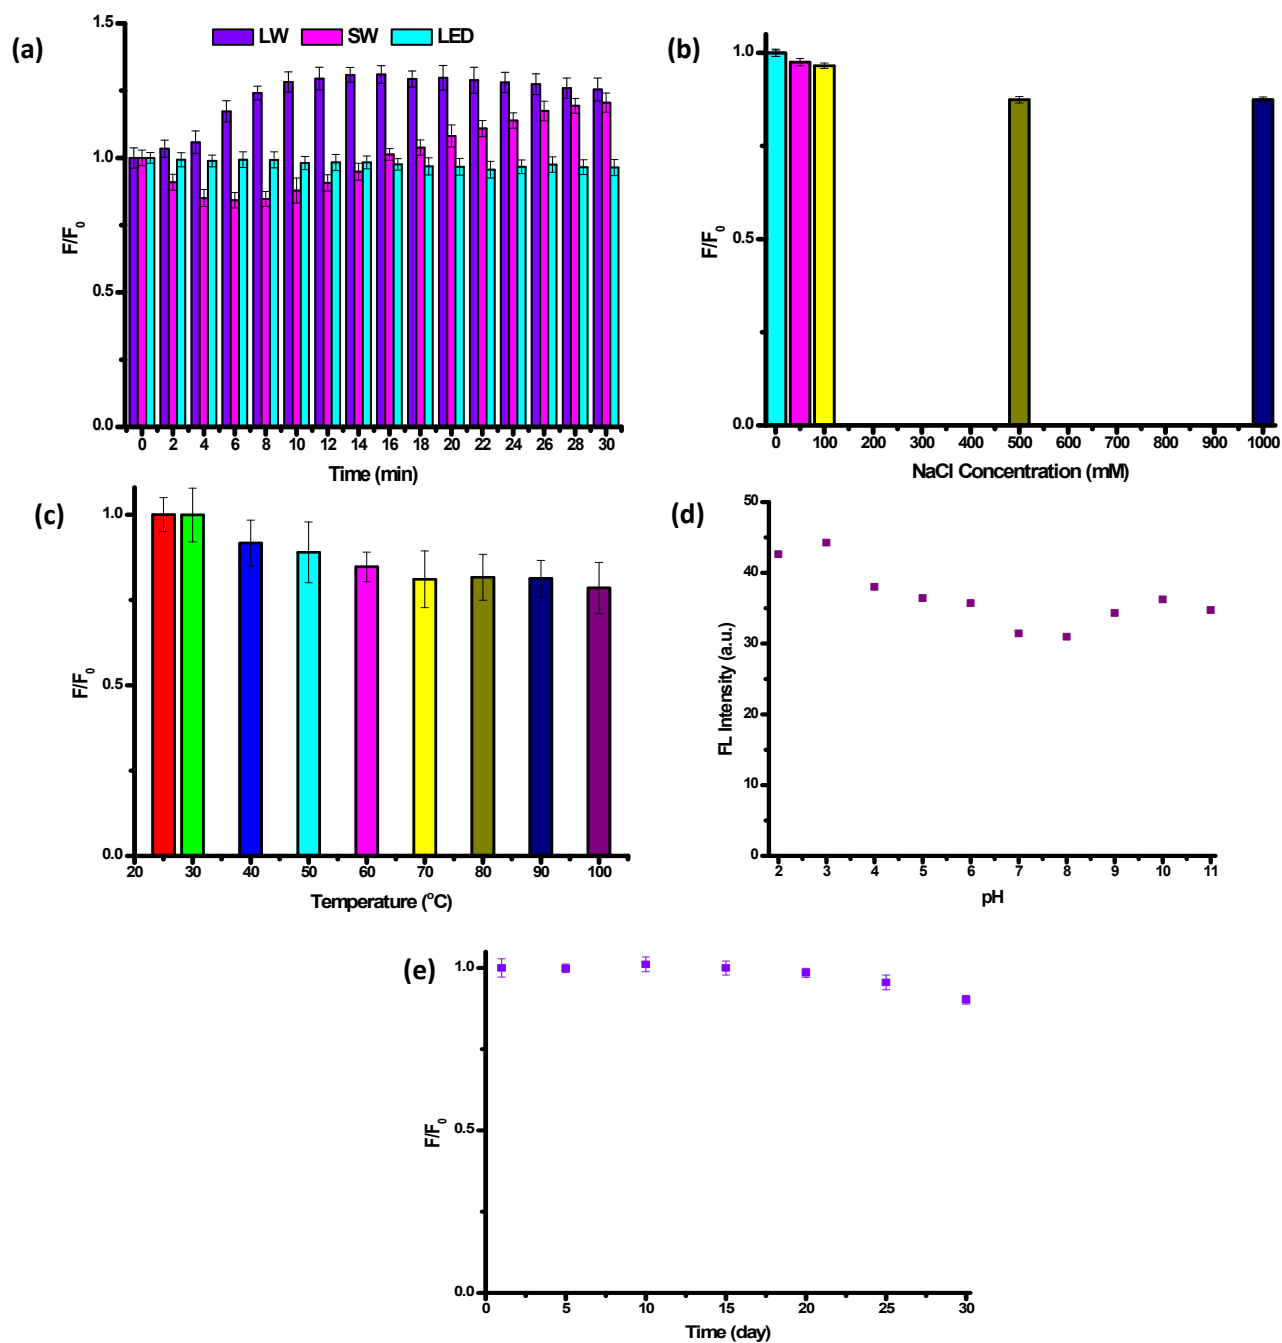

108 **Figure S2.** (a) photostability of IO-QDs. (b) the ionic strength of IO-QDs. (c) thermal stability of  
 109 IO-QDs. (d) pH stability of IO-QDs. (e) long term stability of IO-QDs

110

111

112 **Figure S3**

113

114

115

116

117

118

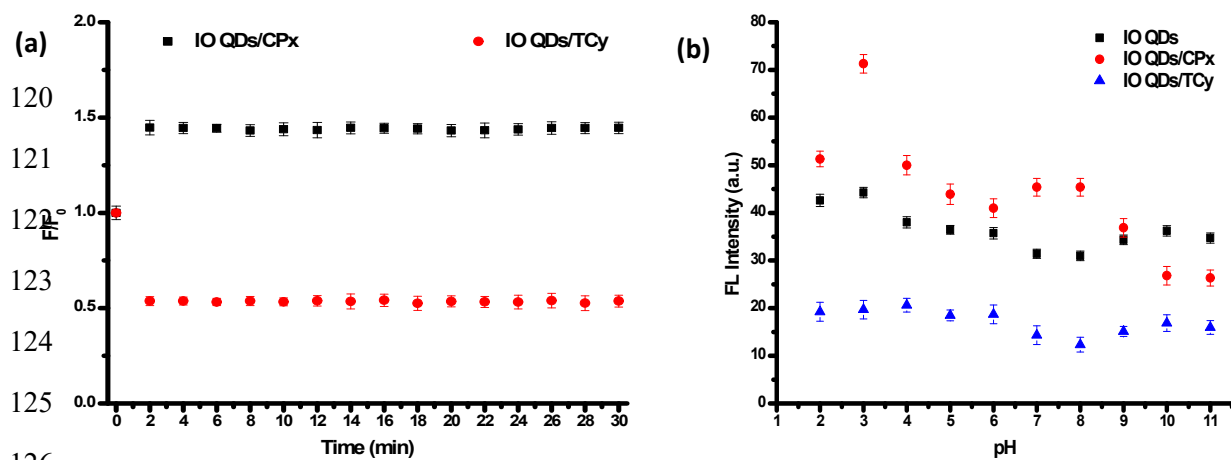

126

127

128 **Figure S3.** Effect of (a) time reaction (0-30 min) after adding TCy and CPx at a concentration of  
129 500  $\mu$ M, respectively. (b) pH value (2-11) of IO-QDs, IO-QDs/CPx, and IO-QDs/TCy system on  
130 fluorescence intensity at a concentration of 500  $\mu$ M.

131

132

133

134

135

136

137

138

139

140

141 **Figure S4**

142

143

144

145

(a)

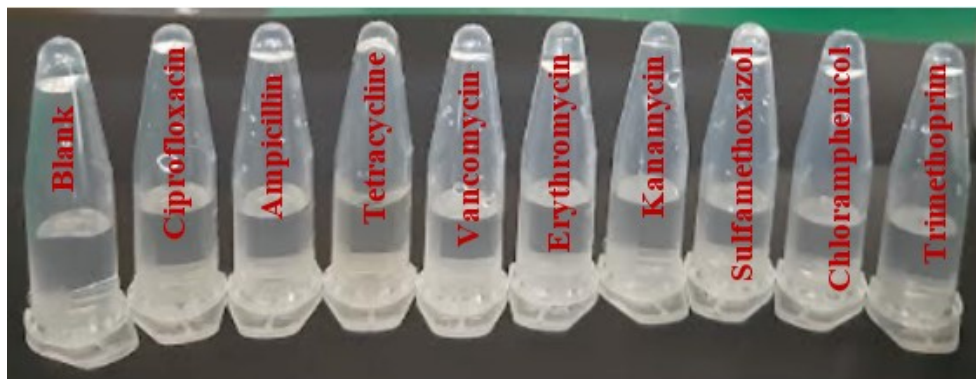

146

147

148

149

150

151

152

(b)

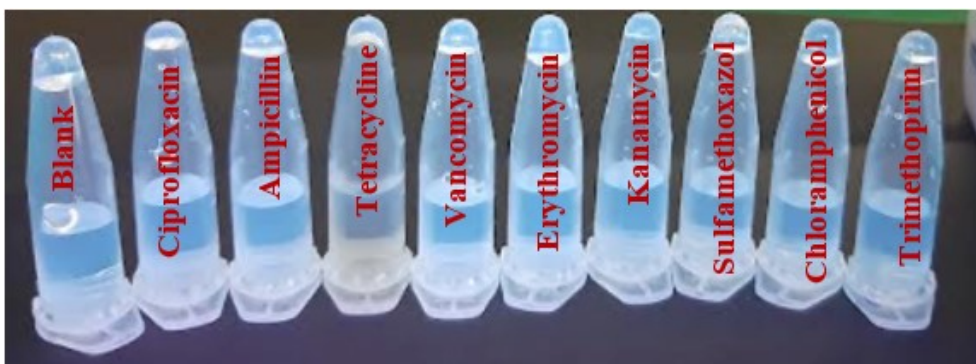

153

154

155

156

157

158

159

160 **Figure S4.** IO-QDs solution in the absence and presence of various antibiotics at 200  $\mu$ M under

161 (a) daylight. (b) UV light ( $\lambda=365$  nm)

162

163

164

165

166

167

168

169

170 **Figure S5**

171

172

173

174

175

176

177

178

179

180

181

182

183

184

185

186

187

188

189

190

191

192

193

194

195

196

197

198

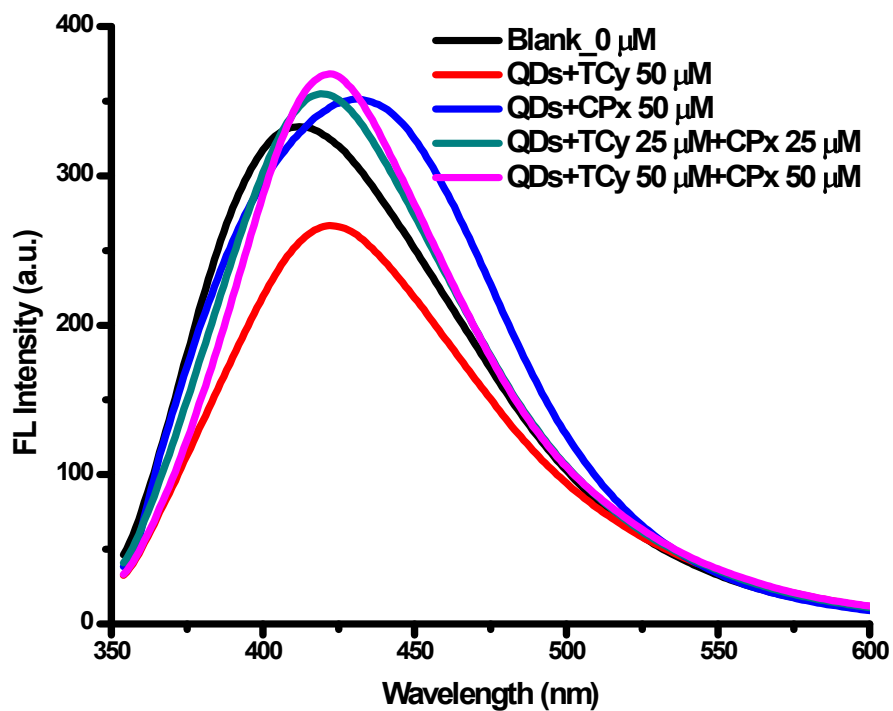

**Figure S5.** Spectra of IO-QDs probe with TCy, CPx, and TCy/CPx mixture, respectively

199 **Figure S6**

200

201

202

203

204

205

206

207

208

209

210

211

212

213

214

215

216

217

218

219

220

221

222

223

224

225

226

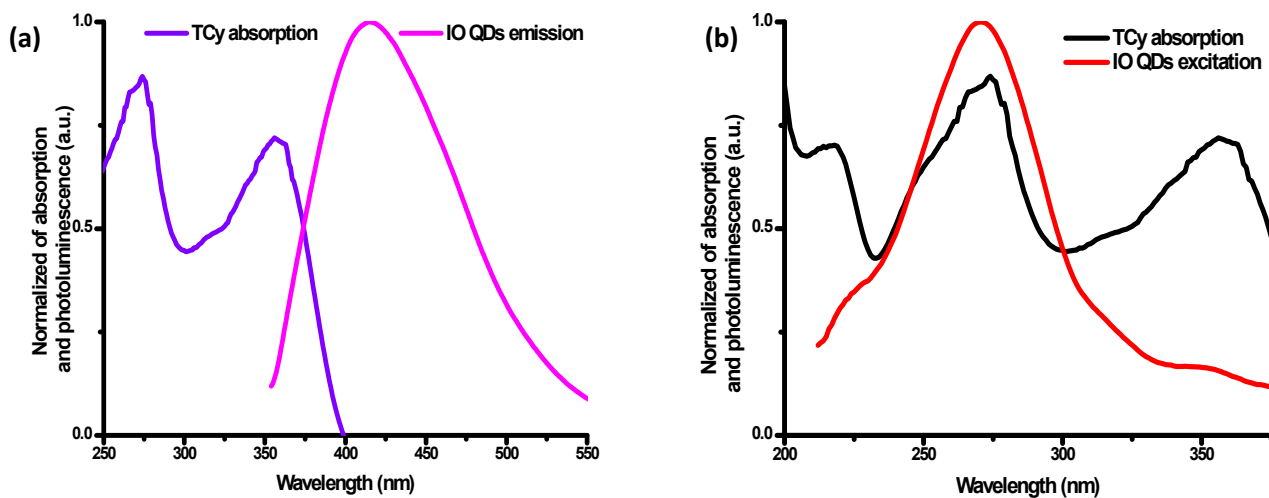

**Figure S6.** Spectral overlap in (a) FRET. (b) IFE



227 **Figure S7**

228

229

230

231

232

233

234

235

236

237

238

239

240

241

242

243

244

245 **Figure S7.** The fluorescence spectrum of ciprofloxacin at an excitation wavelength of 330 nm

246

247

248

249

250

251

252

253

254

255

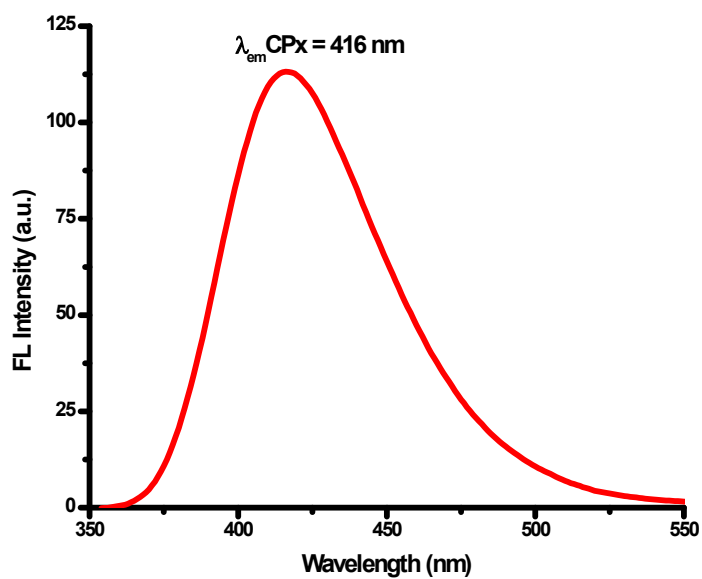

256 **Förster resonance energy transfer (FRET) calculation**

257 Förster distance ( $R_0$ ) was calculated using the formula [1]:

258 
$$R_0 = 0.02108(k^2 \phi_D \eta^{-4} J)^{1/6} \quad (1)$$

259 Where  $R_0$  is the Förster distance (in nm),  $k^2$  denotes dipole orientation factor (2/3) [2],  $\phi_D$   
260 denotes fluorescence quantum yield of IO QDs,  $\eta$  denotes the refractive index of the solvent, and  
261  $J$  denotes the overlap integral ( $\text{nm}^4 \text{M}^{-1} \text{cm}^{-1}$ ).

262 Overlap integral ( $J$ ) was calculated [1]:

263 
$$J = \int_0^\infty F_D(\lambda) \epsilon_A(\lambda) \lambda^4 d\lambda \quad (2)$$

264 Energy transfer efficiency ( $E$ ) was calculated as follows [1]:

265 
$$E = 1 - \frac{\tau_{DA}}{\tau_D} = 1 - \frac{IDA}{ID} \quad (3)$$

266 Where  $E$  refers to energy transfer efficiency,  $\tau_{DA}$  and  $\tau_D$  refer to the fluorescence lifetime of IO  
267 QDs in the presence and absence of TCy, respectively.

268 Donor-acceptor distance ( $r$ ) was estimated by engaging the formula [1]:

269 
$$E = \frac{1}{[1 + (\frac{r}{R_0})^6]} \quad (4)$$

270

271 **Stern-Volmer plot**

272 The quenching efficiency represents the Stern-Volmer quenching constant ( $K_{SV}$ ) which can be  
273 calculated as follow [3]:

274 
$$F_0/F = K_{sv}[Q] + 1 \quad (5)$$

275 where  $F$  and  $F_0$  denote the fluorescence intensity of the IO QDs in the presence and absence TCy,  
276  $K_{SV}$  denotes the Stern-Volmer quenching constant, and  $Q$  denotes the concentration of TCy.

277 The quenching rate constant was calculated according to the equation as follows [4]:

278 
$$K_{SV} = K_q \tau_0 \quad (6)$$

279  $K_q$  is the quenching rate constant, and  $\tau_0$  is the fluorescence lifetime of IO QDs.

280 **References:**

- 281 1. Hildebrandt, I.M.a.N., *FRET - Förster Resonance Energy Transfer\_ From Theory to*  
282 *Applications*. 2014: Wiley-VCH.
- 283 2. Chou, K.F. and A.M. Dennis, *Forster Resonance Energy Transfer between Quantum Dot*  
284 *Donors and Quantum Dot Acceptors*. *Sensors (Basel)*, 2015. **15**(6): p. 13288-325.
- 285 3. Khawla, M., et al., *ZnS quantum dots as fluorescence sensor for quantitative detection of*  
286 *tetracycline*. *Optical Materials*, 2022. **125**: p. 112103.
- 287 4. Waghmare, M.N., et al., *Functionalized Alpha-lactalbumin Conjugated with Gold*  
288 *Nanoparticle for Targeted Drug Delivery*. *ChemistrySelect*, 2020. **5**(6): p. 2035-2049.

289
